# Supplementary material
Source: PubMed Central journal article supplement (PMC6353561)
Supplement: NIHMS985324-supplement-Supp_Table.pdf [file NIHMS985324-supplement-Supp_Table.pdf]

## Supporting Information for

### Effects and Mechanism of Nicotinamide Against UVA- and/or UVB-mediated DNA Damages in Normal Melanocytes

*Gagan Chhabra, Debra R. Garvey, Chandra K. Singh, Charlotte A. Mintie, Nihal Ahmad*

**Table S1.** Antibodies used for western blotting (WB) or immunofluorescence (IF).

| <b>Gene Name</b> | <b>Supplier</b>   | <b>Catalog Number</b> | <b>WB Dilution</b> | <b>IF Dilution</b> | <b>Molecular Weight (kDa)</b> |
|------------------|-------------------|-----------------------|--------------------|--------------------|-------------------------------|
| NRF2             | Cell Signaling    | 12721                 | 1:1000             |                    | 97-100                        |
| KEAP1            | Cell Signaling    | 4617                  | 1:1000             |                    | 60                            |
| $\beta$ -Actin   | Cell Signaling    | 4970                  | 1:1000             |                    | 42                            |
| CPD              | Cosmo Bio         | NM-DND-001            |                    | 1:150              | n/a                           |
| 8oxoG            | Abcam             | ab62623               |                    | 1:333              | n/a                           |
| Alexa Fluor 594  | Life Technologies | A-11020               |                    | 1:100              | n/a                           |

**Table S2.** Primer sequences used for RT-qPCR analysis.

| Gene  | Amplicon size (bp) | Primer orientation | Primer Sequence (5' - > 3') | Length | Tm   | Primer Bank ID       |
|-------|--------------------|--------------------|-----------------------------|--------|------|----------------------|
| DDB1  | 83                 | F                  | ACCGGACACTTTACTTCGGC        | 20     | 62.1 | 148529013c2          |
|       |                    | R                  | TCGGCGGTGACCACATAGA         | 19     | 62.7 |                      |
| DDB2  | 87                 | F                  | CCTTCATCAAAGGGATTGGAGC      | 22     | 61.0 | 164419759c3          |
|       |                    | R                  | TTGAGGAGGCGTAAAAGTGGT       | 21     | 61.3 |                      |
| OGG1  | 117                | F                  | ATGGGGCATCGTACTCTAGC        | 20     | 60.9 | 197276609c1          |
|       |                    | R                  | CTCCCTCCACCGGAAAGAT         | 19     | 60.4 |                      |
| ERCC1 | 76                 | F                  | CCTTATTCCGATCTACACAGAGC     | 23     | 60.0 | 260593723c1          |
|       |                    | R                  | TATTCGGCGTAGGTCTGAGGG       | 21     | 62.8 |                      |
| ERCC2 | 121                | F                  | AGAAGGTGATTGAAGAGCTTCG      | 22     | 60.0 | 195947406c2          |
|       |                    | R                  | ACCTCAGGGTGAATACACAAGT      | 22     | 60.7 |                      |
| CDK7  | 97                 | F                  | GGAGCCCCAATAGAGCTTATACA     | 23     | 61.0 | 161016768c2          |
|       |                    | R                  | TCCACACCTACACCATACATCC      | 22     | 60.9 |                      |
| SIRT1 | 160                | F                  | TAGCCTTGTCAGATAAGGAAGGA     | 23     | 60.0 | 215982797c1          |
|       |                    | R                  | ACAGCTTCACAGTCAACTTTGT      | 22     | 60.2 |                      |
| TP53  | 125                | F                  | CAGCACATGACGGAGGTTGT        | 20     | 62.4 | 371502118c1          |
|       |                    | R                  | TCATCCAAATACTCCACACGC       | 21     | 60.1 |                      |
| GAPDH | 101                | F                  | CTGGGCTACACTGAGCACC         | 19     | 62   | 378404907c3          |
|       |                    | R                  | AAGTGGTCGTTGAGGGCAATG       | 21     | 62.9 |                      |
| ACTB  | 135                | F                  | CACCATTGGCAATGAGCGGTTC      | 22     | 67.5 | Origene#<br>HP204660 |
|       |                    | R                  | AGGTCTTTGCGGATGTCCACGT      | 22     | 65.9 |                      |
